# Supplementary material for: HIV incidence after pre-exposure prophylaxis initiation among women and men at elevated HIV risk: A population-based study in rural Kenya and Uganda
Source: PubMed Central journal article supplement (PMC7872279; doi:10.1371/journal.pmed.1003492), 2021-02-09

**S1 Fig. PrEP program engagement, refills, self-reported adherence among PrEP initiators, overall and by self-assessed current HIV risk through week 60**

**A. Overall**

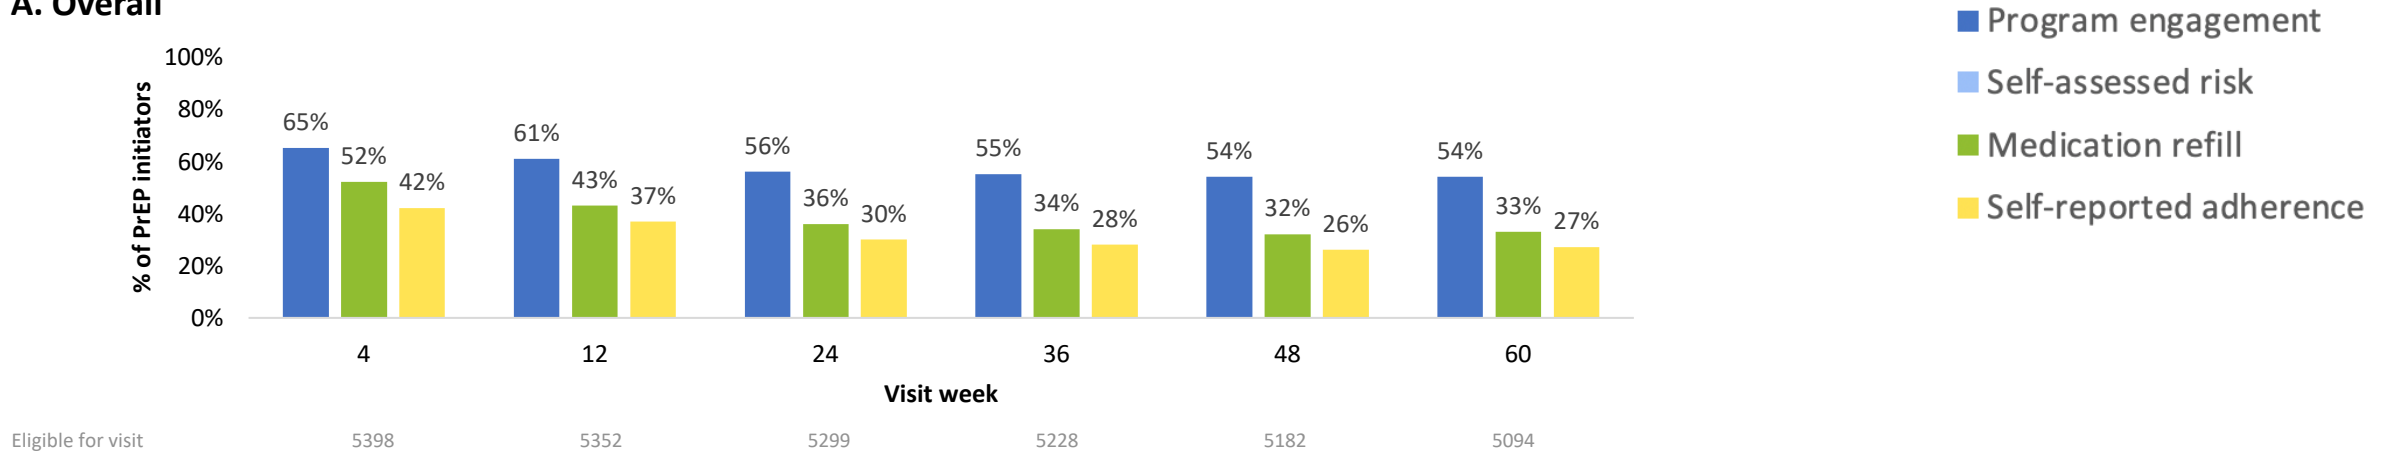

**B. Participants reporting self-assessed current HIV risk at follow-up visits, and the proportion receiving refills and self-reporting adherence**

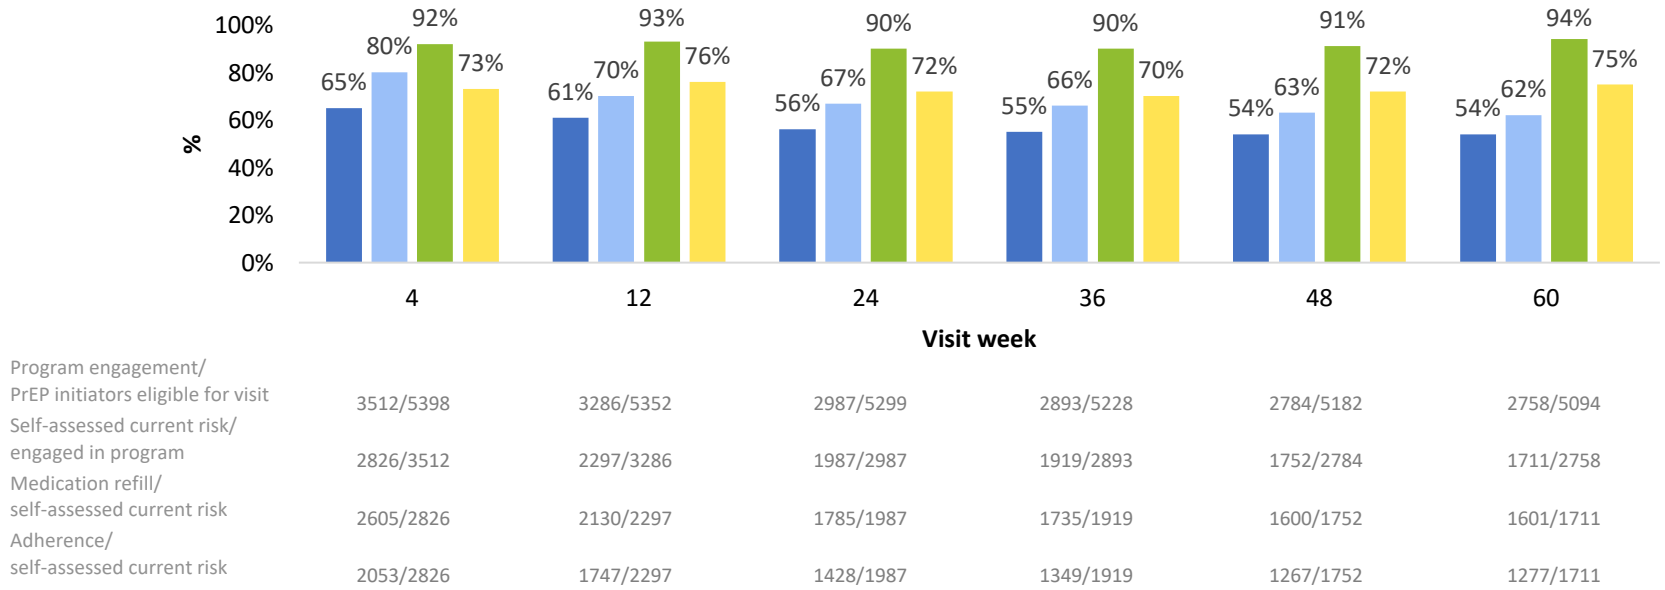

Supplement: pmed.1003492.s003.pdf [file pmed.1003492.s003.pdf]
