# Supplementary material for: HIV incidence after pre-exposure prophylaxis initiation among women and men at elevated HIV risk: A population-based study in rural Kenya and Uganda
Source: PubMed Central journal article supplement (PMC7872279; doi:10.1371/journal.pmed.1003492), 2021-02-09
Supplement: pmed.1003492.s004.pdf [file pmed.1003492.s004.pdf]

**S2 Fig. PrEP program engagement, refills, self-reported adherence among PrEP initiators through week 60, by sex**

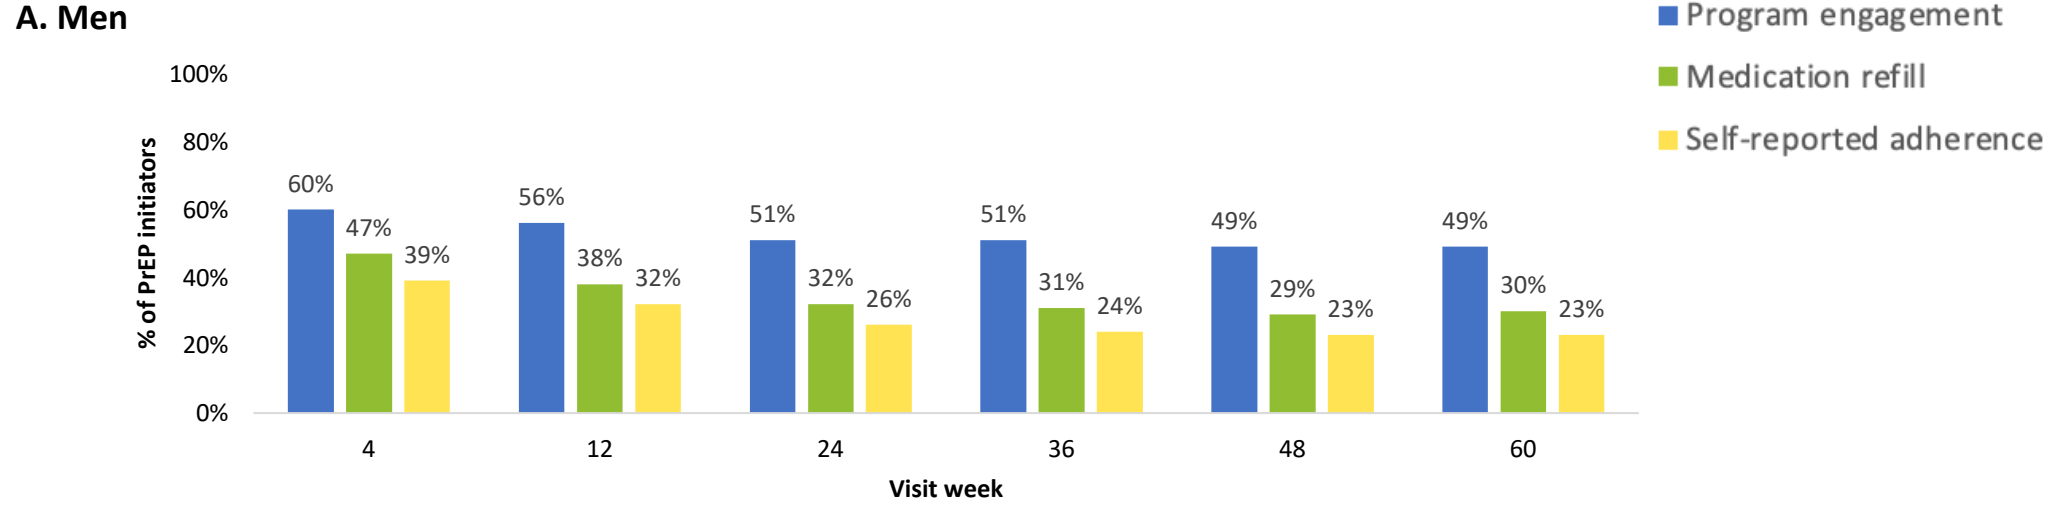

Eligible for visit: 2750 (week 4), 2724 (week 12), 2698 (week 24), 2662 (week 36), 2635 (week 48), 2611 (week 60)

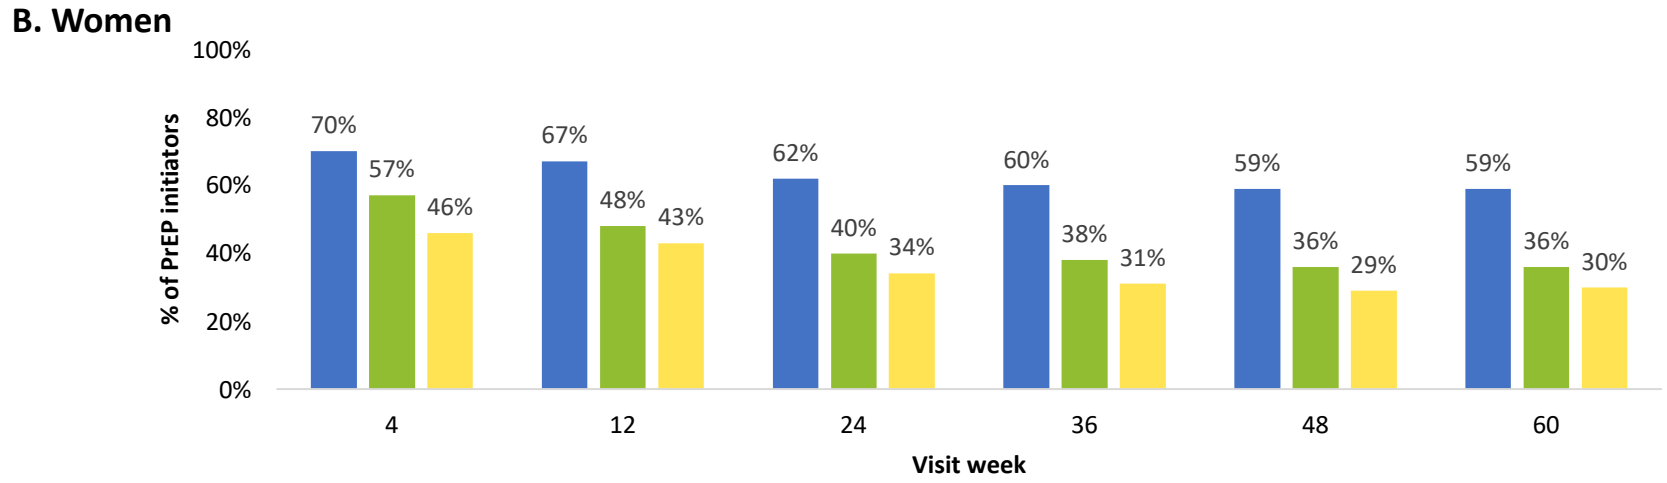

Eligible for visit: 2648 (week 4), 2628 (week 12), 2601 (week 24), 2566 (week 36), 2547 (week 48), 2483 (week 60)
