# Supplementary material for: HIV incidence after pre-exposure prophylaxis initiation among women and men at elevated HIV risk: A population-based study in rural Kenya and Uganda
Source: PubMed Central journal article supplement (PMC7872279; doi:10.1371/journal.pmed.1003492), 2021-02-09
Supplement: pmed.1003492.s005.pdf [file pmed.1003492.s005.pdf]

**S3 Fig. PrEP program engagement, refills, self-reported adherence at week 24 by age/sex strata**

**A. Overall**

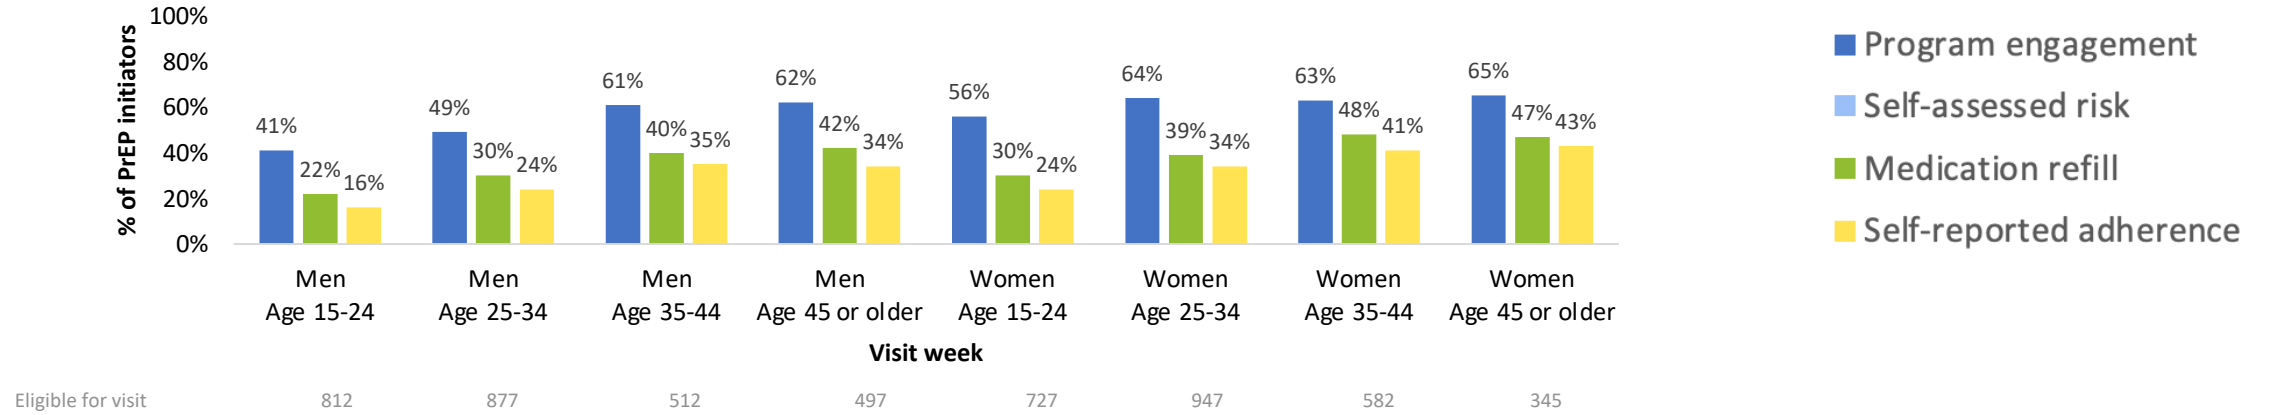

**B. Participants reporting self-assessed current HIV risk at follow-up visits, and the proportion receiving refills and self-reporting adherence**

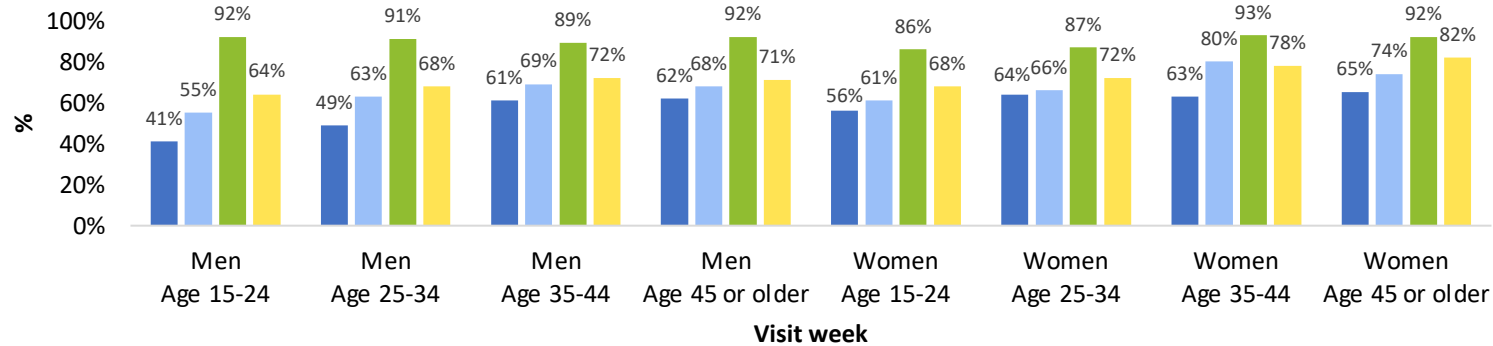

|                                                           | Men Age 15-24 | Men Age 25-34 | Men Age 35-44 | Men Age 45 or older | Women Age 15-24 | Women Age 25-34 | Women Age 35-44 | Women Age 45 or older |
|-----------------------------------------------------------|---------------|---------------|---------------|---------------------|-----------------|-----------------|-----------------|-----------------------|
| Program engagement/<br>PrEP initiators eligible for visit | 334/812       | 433/877       | 310/512       | 310/497             | 404/727         | 604/947         | 368/582         | 224/345               |
| Self-assessed current risk/<br>engaged in program         | 184/334       | 274/433       | 214/310       | 212/310             | 245/404         | 399/604         | 294/368         | 165/224               |
| Medication refill/<br>self-assessed current risk          | 170/184       | 248/274       | 190/214       | 195/212             | 210/245         | 349/399         | 272/294         | 151/165               |
| Adherence/<br>self-assessed current risk                  | 117/184       | 185/274       | 155/214       | 151/212             | 167/245         | 288/399         | 229/294         | 136/165               |
