# Supplementary material for: HIV incidence after pre-exposure prophylaxis initiation among women and men at elevated HIV risk: A population-based study in rural Kenya and Uganda
Source: PubMed Central journal article supplement (PMC7872279; doi:10.1371/journal.pmed.1003492), 2021-02-09

**S4 Fig. Timeline of PrEP follow-up, HIV testing, and adherence to PrEP estimated from tenofovir concentrations in hair for a participant with incident HIV infection with two-class antiretroviral drug resistance**

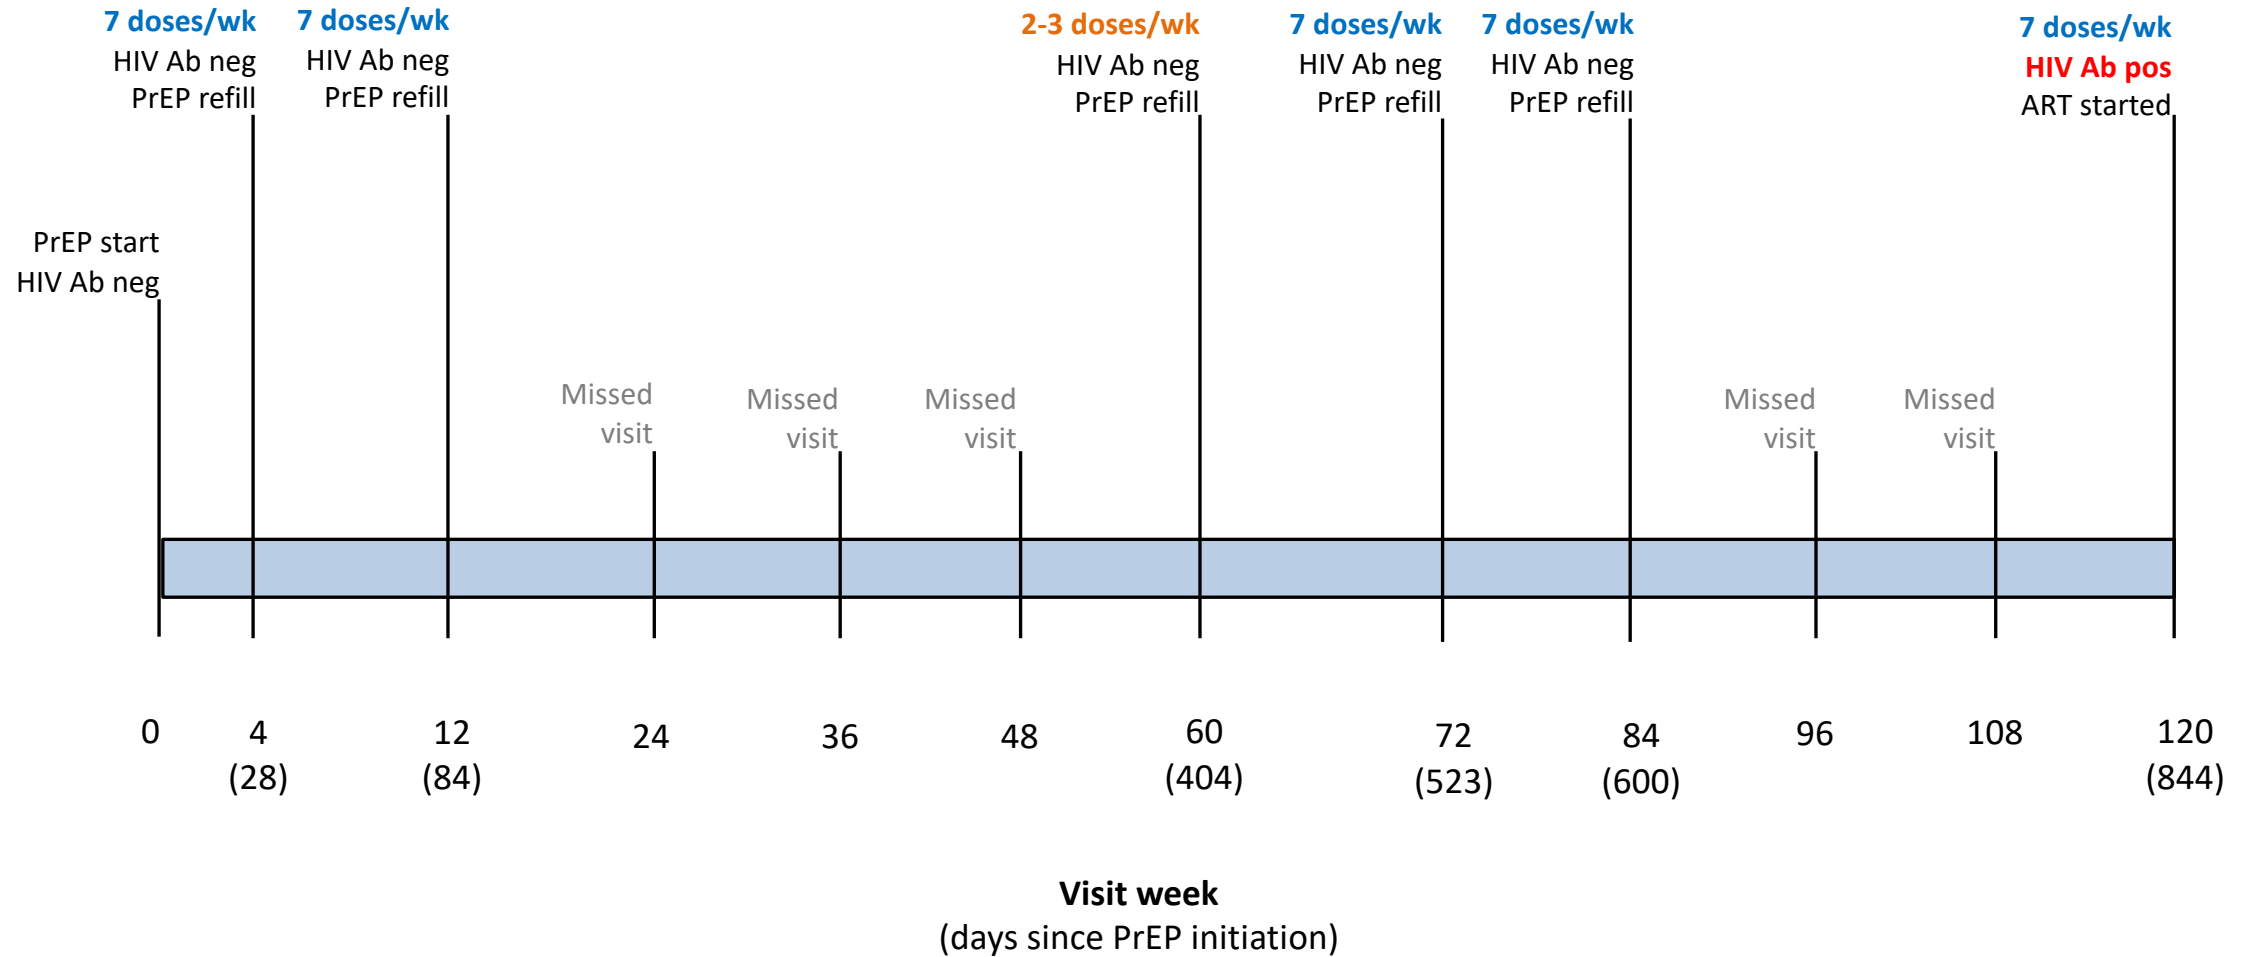

Supplement: pmed.1003492.s006.pdf [file pmed.1003492.s006.pdf]
